# Supplementary material for: Interaction between Hormonal Receptor Status, Age and Survival in Patients with BRCA1/2 Germline Mutations: A Systematic Review and Meta-Regression
Source: PubMed Central journal article supplement (PMC4858163; doi:10.1371/journal.pone.0154789), 2016-05-05

**A**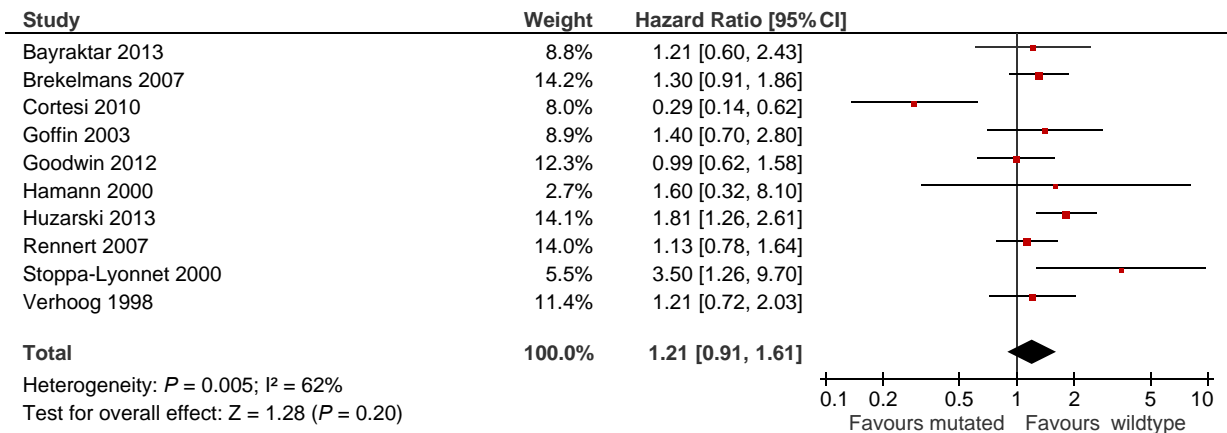**B**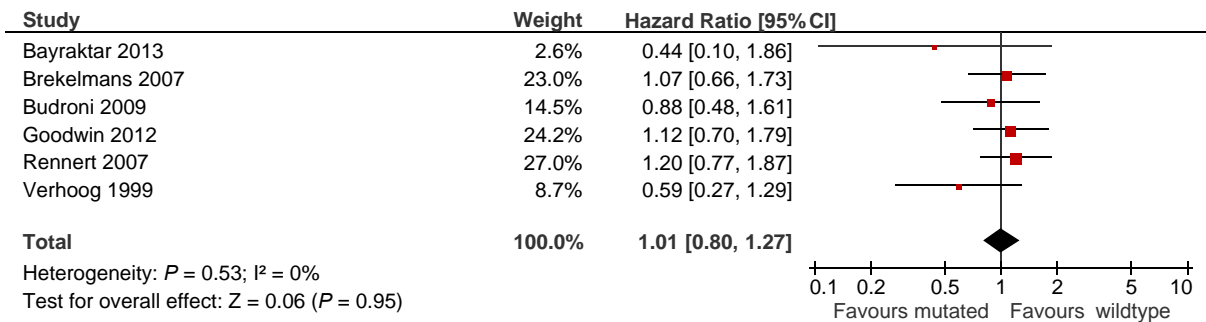**C**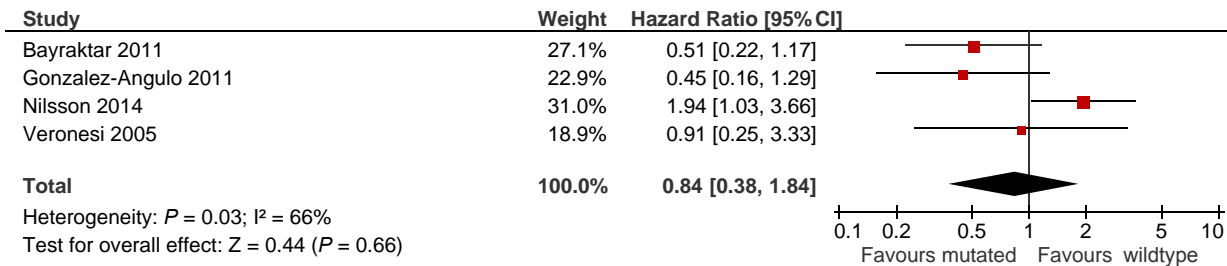

Supplement: pone.0154789.s002.pdf [file pone.0154789.s002.pdf]
